# Supplementary material
Source: publisher figshare collection journal article supplement (https://tandf.figshare.com/ndownloader/files/21747441)
Supplement: Supplementary file 1 [file 21747441]

**Supporting Information**


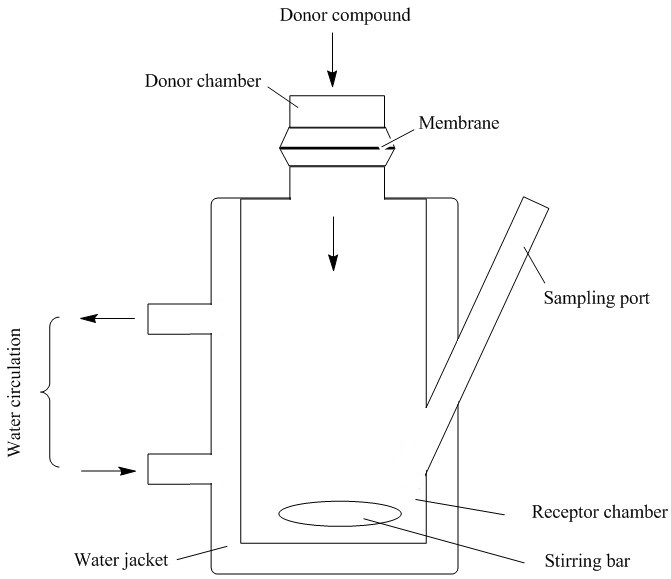


Figure S1. Ex vivo diffusion system (the Franz diffusion chamber).

Figure S2. Absorption spectra of silver nanoparticles after 2, 3, 4, 5 and 6 weeks of the synthesis.


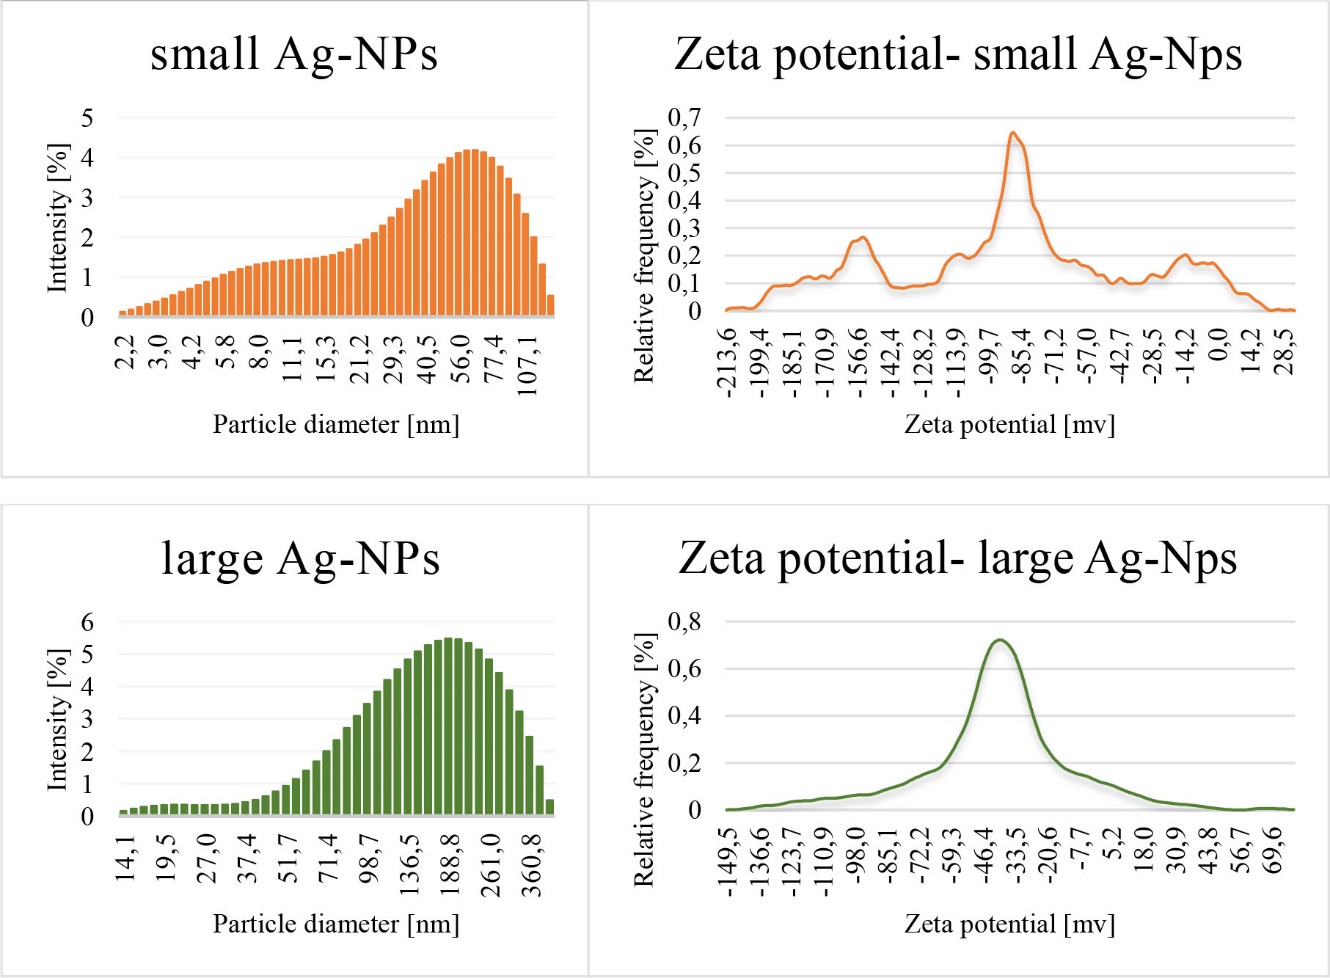
Figure S3. Diagrams of the particle diameter and zeta potential for both Ag-NPs.
